# Supplementary material for: Neuroprotective role of PrPC against kainate-induced epileptic seizures and cell death depends on the modulation of JNK3 activation by GluR6/7–PSD-95 binding
Source: PubMed Central journal article supplement — Mol Biol Cell. 2011 Sep 1;22(17):3041–54. doi: 10.1091/mbc.E11-04-0321 (PMC3164453; doi:10.1091/mbc.e11-04-0321), 2011-09-01
Supplement: supp_E11-04-0321_CombinedSupMats.pdf [file supp_E11-04-0321_CombinedSupMats.pdf]

## Supplementary Figure 1.

### RT-qPCR

| Gene         |         | Sequence 5'-3'             | Length |
|--------------|---------|----------------------------|--------|
| <i>c-fos</i> | Forward | ACCATGATGTTCTCGGGTTTCAA    | 23     |
|              | Reverse | GCTGGTGGAGATGGCTGTCAC      | 21     |
| <i>c-jun</i> | Forward | TGAAAGCTGTGTCCCCTGTC       | 20     |
|              | Reverse | ATCACAGCACATGCCACTTC       | 20     |
| <i>cox-2</i> | Forward | CTTCACGCATCAGTTTTTCAAG     | 22     |
|              | Reverse | TCACCGTAAATATGATTTAAGTCCAC | 26     |
| <i>gapdh</i> | Forward | AGGTCGGTGTGAACGGATTTG      | 21     |
|              | Reverse | TGTAGACCATGTAGTTGAGGTCA    | 23     |

### Genotyping

| Gene        |       | Sequence 5'-3'              | Length |
|-------------|-------|-----------------------------|--------|
| <i>Jnk3</i> | MJ3F3 | CGTAATCTTGTCACAGAAATCCCATAC | 27     |
|             | MJ3B3 | CCTGCTTCTCAGAAACACCCTTC     | 23     |
|             | PGKP1 | CTCCAGACTGCCTTGGGAAAA       | 21     |
